# Supplementary material for: Pancreatic Stone Protein as a Biomarker for Sepsis at the Emergency Department of a Large Tertiary Hospital
Source: MDPI journal article supplement (doi:10.3390/pathogens11050559), 2022-05-09
Supplement: s1 [file s1]

**Table S1.** MEWS score.

|                                | Points |       |        |         |             |                  |              |
|--------------------------------|--------|-------|--------|---------|-------------|------------------|--------------|
|                                | 3      | 2     | 1      | 0       | 1           | 2                | 3            |
| Systolic blood pressure (mmHg) | <70    | 71–80 | 81–100 | 101–199 |             | ≥200             |              |
| Heart rate (bpm)               |        | <40   | 41–50  | 51–100  | 101–110     | 111–129          | ≥130         |
| Respiratory rate (/min)        |        | <9    |        | 9–14    | 15–20       | 21–29            | ≥30          |
| Temperature (°C)               |        | <35   |        | 35–38.4 |             | ≥38.5            |              |
| Neurological score             |        |       |        | Alert   | Reacting to | Reacting to pain | Unresponsive |
